# Supplementary material for: Analytical performance evaluation of a multiplex real-time RT-PCR kit for simultaneous detection of SARS-CoV-2, influenza A/B, and RSV
Source: PeerJ. 2025 Jul 30;13:e19693. doi: 10.7717/peerj.19693 (PMC12317686; doi:10.7717/peerj.19693)
Supplement: Supplemental Information 1 [file peerj-13-19693-s001.xlsx]

## Sheet: SARS-CoV-2
Liat	LabTurbo Qudraplex
27.61	27.48
24.89	25.32
19.1	19.52
8.51	8.07
23.45	24.24
32.93	31.81
31.73	30.57
21.02	21.29
11.94	11.13
13.74	13.3
8.18	8.58
29.41	29.98
10.78	11.35
11.55	11.04
28.58	28.91
23.35	23.97
16.55	15.57
10.11	9.87
21.71	22.83
9.23	9.84
11.26	10.82
21.96	22.48
19.15	19.86
11.76	12.17
24.92	24.37
19.58	19.03
20.68	20.3
12.91	12.39
9.46	8.44
32.67	32.41
18.62	18.27
12.62	12.01
10.36	9.96
23.26	23.7
9.28	8.66
21.42	21.02
13.81	13.39
28.22	27.86
15.18	15.78
27.45	27.92
29.55	29.03
25.36	25.88
28.05	28.47
26.75	26.33
17.95	17.43
19.84	19.42
22.84	22.32
22.06	21.64
13.26	13.74
14.92	15.44
25.75	26.27
27.14	26.62
31.26	30.84
18.09	18.61
29.85	30.37
25.07	24.65
14.08	14.6
15.89	15.47
20.23	19.81
24.67	24.15
28.75	29.27
26.44	26.96
22.78	22.36
16.23	16.75
17.24	17.76
12.17	11.75
23.96	24.48
20.95	21.47
30.82	31.34
32.15	31.73
14.55	15.07
27.84	27.42
9.99	9.57
31.45	31.97
18.35	18.87
32.38	31.96
15.64	16.16
10.94	10.52
17.68	17.26
30.09	30.61
21.33	21.85
13.49	13.07
16.88	16.46
22.91	22.49
12.38	12.9
29.14	28.72
24.14	23.72
20.5	21.02
11.08	10.66
28.93	29.45
25.98	25.56
23.09	23.61
15.41	15.93
8.96	8.85
28.81	27.79
17.81	17.59
30.49	30.45
16.9	16.34
11.61	11.1
20.68	21.02
20.4221	20.3782

## Sheet: Inf A
Liat	LabTurbo Qudraplex
33.61	33.74
18.86	20.23
29.37	28.21
31.76	33.09
15.21	16.07
19.39	18.78
12.83	12.86
24.79	24.18
19.38	19.93
27.23	28.24
26.17	24.96
29.89	30.09
31.92	30.8
21.31	20.27
25.11	26.33
17.12	16.95
27.91	26.51
31.55	30.86
11.54	12.86
29.89	31.11
12.91	12.25
26.07	26.95
33.21	34
18.29	18.9
30.19	30.13
18.56	18.94
13.63	14.17
11.96	13.23
10.85	10
13.73	14.81
14.09	12.98
24.28	25.67
11.37	12.65
30.08	28.74
29.37	29.92
15.77	16.06
19.28	18.1
15.21	14.35
15.55	15.69
23.08	23.88
33.05	33.42
28.9	29.91
28.67	28.26
12.67	13.55
17.48	17.85
27.61	29.05
32.69	33.04
17.36	16.82
31.38	30.63
22.43	23.88
22.755	23.88
22.4912	22.678
7.37433	7.34485

## Sheet: Inf B
Liat	LabTurbo Qudraplex
20.27	21.85
18.84	19.68
26.15	26.09
22.88	24.25
23.16	23.02
14.14	15.83
25.77	24.88
27.68	25.89
12.31	11.73
16.44	18.09
12.32	12.28
27.27	26.56
16.37	14.57
28.88	27.93
27.71	26.74
31.01	32
30.32	29.68
10.01	10
26.51	27.87
29.13	30.22
24.14	22.98
14.26	12.63
22.2	22.42
30.3	30.29
15.28	16.08
21.49	21.06
13.49	14.03
10.97	10
14.99	15.79
21.09	22.35
20.93	19.68
22.83	23.39
21.27	22.98
22.86	22.05
23.48	24.3
24.65	23.06
12.25	10.5
18.67	16.97
31.47	32
25.31	24.54
15.02	14.11
17.45	17.48
28.86	29.77
26.78	27.63
25.18	26.58
10.47	10
22.04	22.55
29.77	30.22
12.82	11.67
17.36	16.27
22.12	22.485
21.297	21.2508
6.27544	6.51713

## Sheet: RSV
Liat	LabTurbo Qudraplex
29.17	28.75
28.42	26.63
22.18	22.06
15.29	15
24.52	24.4
30.15	30.68
32.85	33
15.67	16.05
26.56	25.73
20.7	20.22
19.06	18.82
27.81	29
32.23	33
18.28	18.12
17.85	18.49
18.46	19.72
15.63	15.45
21.52	21.8
16.33	16.51
17.27	17.95
19.15	19.4
23.37	24.04
22.19	22.14
30.02	28.19
25.23	23.85
19.68	19.93
28.4	28.93
22.28	23.87
29.2	30.68
32.85	32.41
32.7	31.09
18.7	19.44
28.6	27.62
15.34	15
24.23	25.68
29.65	30.63
29.86	28.27
31.18	31.82
31.7	30.89
31.36	31.18
22.9	21.43
21.76	20.28
25.1	25.02
16.73	16.11
17	18.44
16.14	16.81
28.44	28.13
23.26	22.9
22.73	21.49
17.31	16.38
23.08	23.375
23.7402	23.6686
5.70318	5.60524
